# Supplementary material for: Enhancing molecular diversity of peptoid oligomers using amino acid synthons
Source: Royal Society of Chemistry journal article supplement (doi:10.1039/d4ob01564a), 2024-12-12
Supplement: d4ob01564a1.pdf [file d4ob01564a1.pdf]

Supporting Information

**Enhancing Molecular Diversity in Peptoid Oligomers Using Amino Acid Synthons**

Peter T. Smith, Jennifer L. Franco, and Kent Kirshenbaum\*

Department of Chemistry, New York University, New York, New York 10003 (USA)

**Contents**

1. Summarized Mass Spectrometry Characterization Data
2. Analytical RP-HPLC Spectra and MS Spectra
3. Example Peptoids Using Unprotected Tyr, Cys, and His Submonomers
4. Intermolecular, On-Resin DKP Formation
5. Circular Dichroism of Compounds 1,4, and 5

## 1. Summarized MS Characterization Data

**Table S1.** Calculated and observed electrospray ionization mass spectrometry data for synthesized peptoid oligomers **1-16**. Data was obtained using a Waters AutoPurification HPLC/MS system.

| Peptoid   | Molecular Formula                                                                  | Calculated $m/z$       | Observed $m/z$                                   |
|-----------|------------------------------------------------------------------------------------|------------------------|--------------------------------------------------|
| <b>1</b>  | C <sub>25</sub> H <sub>32</sub> N <sub>4</sub> O <sub>6</sub>                      | [ $M + H^+$ ]: 485.24  | [ $M + H^+$ ]: 485.4                             |
| <b>2</b>  | C <sub>29</sub> H <sub>39</sub> N <sub>5</sub> O <sub>6</sub>                      | [ $M + H^+$ ]: 554.30  | [ $M + H^+$ ]: 554.5                             |
| <b>3</b>  | C <sub>41</sub> H <sub>61</sub> N <sub>7</sub> O <sub>9</sub>                      | [ $M + H^+$ ]: 796.46  | [ $M + H^+$ ]: 796.8                             |
| <b>4</b>  | C <sub>29</sub> H <sub>40</sub> N <sub>4</sub> O <sub>6</sub>                      | [ $M + H^+$ ]: 541.30  | [ $M + H^+$ ]: 541.5                             |
| <b>5</b>  | C <sub>41</sub> H <sub>62</sub> N <sub>6</sub> O <sub>9</sub>                      | [ $M + H^+$ ]: 783.47  | [ $M + H^+$ ]: 783.7                             |
| <b>6</b>  | C <sub>31</sub> H <sub>42</sub> N <sub>4</sub> O <sub>5</sub> S                    | [ $M + H^+$ ]: 583.30  | [ $M + H^+$ ]: 583.6                             |
| <b>7</b>  | C <sub>68</sub> H <sub>89</sub> N <sub>11</sub> O <sub>11</sub>                    | [ $M + H^+$ ]: 1236.68 | [ $M + H^+$ ]: 1237.0<br>[ $M + 2H^+$ ]/2: 619.4 |
| <b>8</b>  | C <sub>58</sub> H <sub>78</sub> N <sub>14</sub> O <sub>14</sub>                    | [ $M + H^+$ ]: 1195.59 | [ $M + H^+$ ]: 1195.9<br>[ $M + 2H^+$ ]/2: 598.6 |
| <b>9</b>  | C <sub>66</sub> H <sub>91</sub> N <sub>12</sub> O <sub>11</sub>                    | [ $M + H^+$ ]: 1355.61 | [ $M + H^+$ ]: 1356.1<br>[ $M + 2H^+$ ]/2: 678.7 |
| <b>10</b> | C <sub>63</sub> H <sub>85</sub> BrF <sub>3</sub> N <sub>11</sub> O <sub>14</sub> S | [ $M + H^+$ ]: 1388.52 | [ $M + H^+$ ]: 1390.7<br>[ $M + 2H^+$ ]/2: 695.9 |
| <b>11</b> | C <sub>67</sub> H <sub>88</sub> N <sub>12</sub> O <sub>11</sub>                    | [ $M + H^+$ ]: 1237.68 | [ $M + H^+$ ]: 1238.1<br>[ $M + 2H^+$ ]/2: 619.7 |
| <b>12</b> | C <sub>61</sub> H <sub>87</sub> F <sub>3</sub> N <sub>10</sub> O <sub>12</sub>     | [ $M + H^+$ ]: 1209.66 | [ $M + H^+$ ]: 1209.1<br>[ $M + 2H^+$ ]/2: 605.6 |
| <b>13</b> | C <sub>72</sub> H <sub>91</sub> N <sub>11</sub> O <sub>14</sub> S                  | [ $M + H^+$ ]: 1366.66 | [ $M + H^+$ ]: 1367.0<br>[ $M + 2H^+$ ]/2: 684.1 |
| <b>14</b> | C <sub>68</sub> H <sub>100</sub> N <sub>10</sub> O <sub>11</sub> S                 | [ $M + H^+$ ]: 1265.74 | [ $M + H^+$ ]: 1266.2<br>[ $M + 2H^+$ ]/2: 633.7 |
| <b>15</b> | C <sub>52</sub> H <sub>85</sub> N <sub>9</sub> O <sub>12</sub> S                   | [ $M + H^+$ ]: 1060.61 | [ $M + H^+$ ]: 1061.0<br>[ $M + 2H^+$ ]/2: 531.2 |
| <b>16</b> | C <sub>62</sub> H <sub>95</sub> N <sub>9</sub> O <sub>13</sub> S <sub>2</sub>      | [ $M + H^+$ ]: 1238.66 | [ $M + H^+$ ]: 1239.1<br>[ $M + 2H^+$ ]/2: 620.1 |

## High-resolution Mass Spectrometry (HRMS) of Peptoids 1, 4, and 5

HRMS spectra were obtained for compounds 1, 4, and 5 using a Waters G3 QToF MS system (ZORBAX StableBond 300, C<sub>18</sub>, 4.6 x 50 mm).

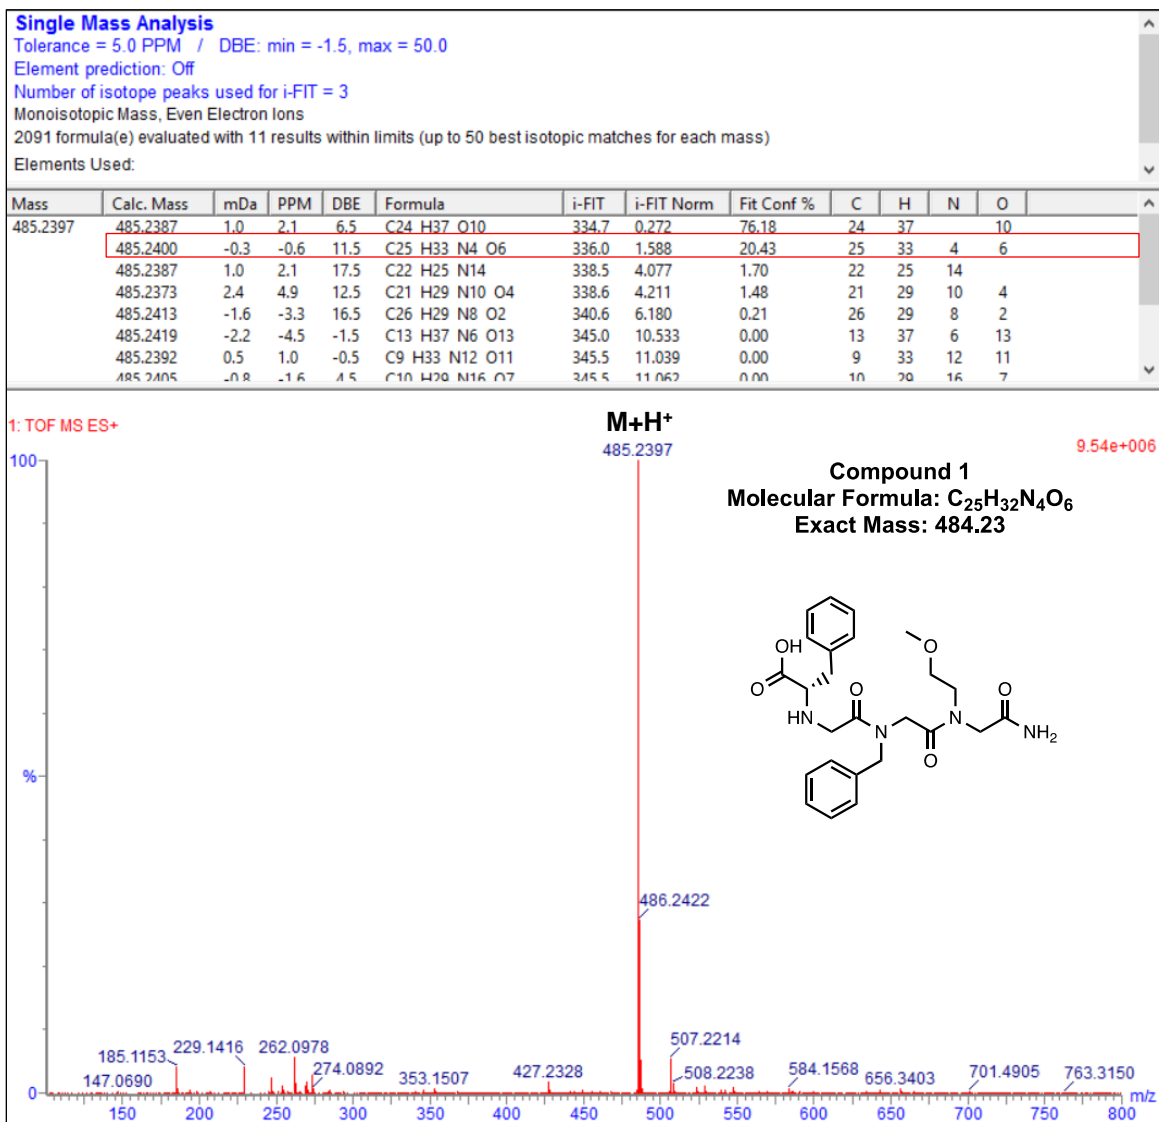

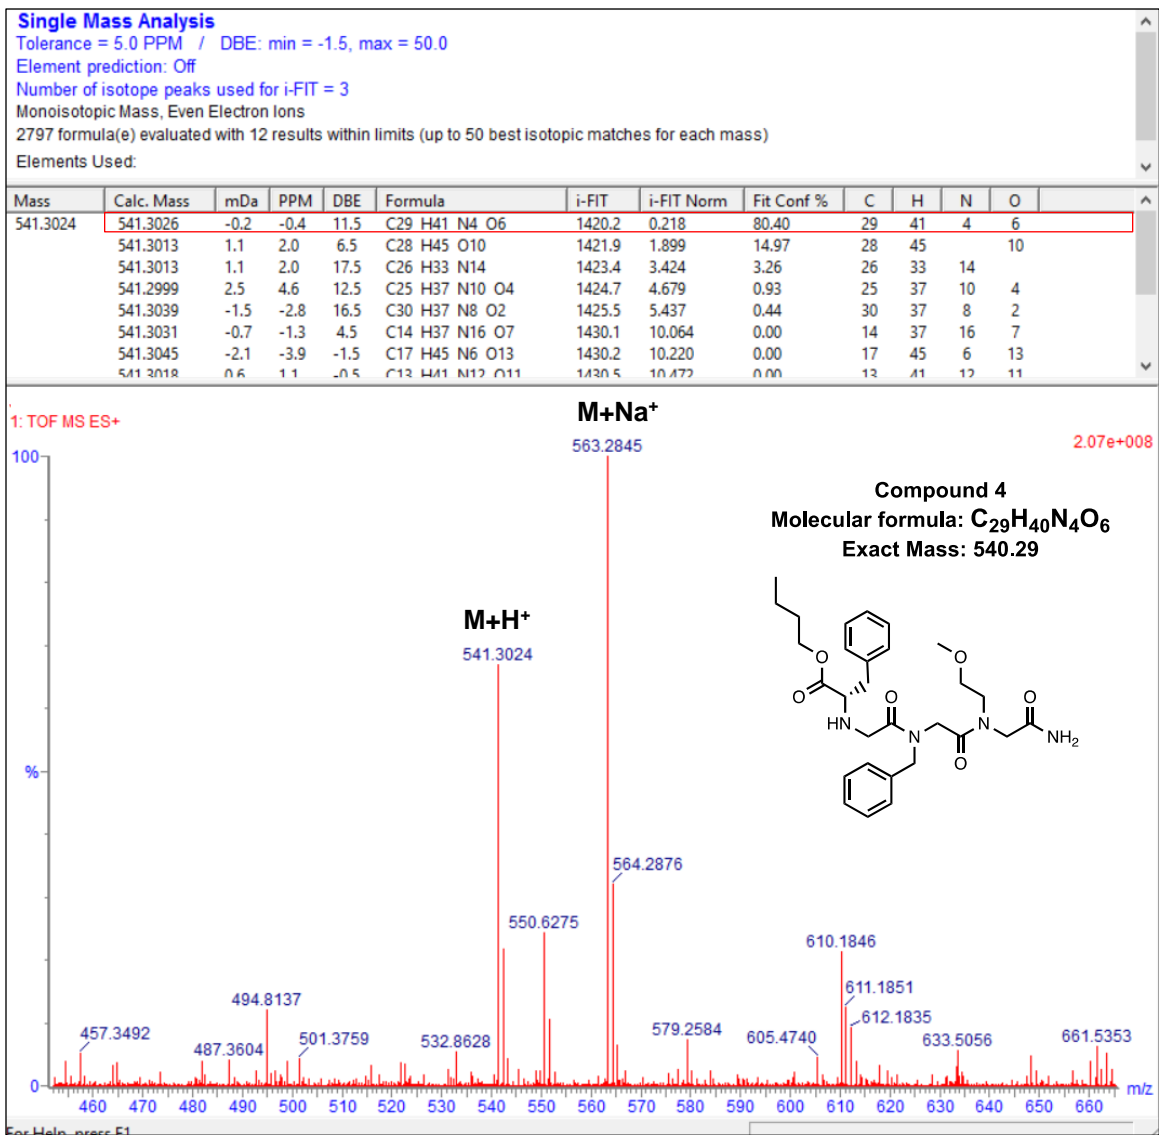

### Single Mass Analysis

Tolerance = 5.0 PPM / DBE: min = -1.5, max = 50.0

Element prediction: Off

Number of isotope peaks used for i-FIT = 3

Monoisotopic Mass, Even Electron Ions

7598 formula(e) evaluated with 30 results within limits (up to 50 best isotopic matches for each mass)

Elements Used:

| Mass     | Calc. Mass | mDa  | PPM  | DBE  | Formula        | i-FIT | i-FIT Norm | Fit Conf % | C  | H  | N  | O  |
|----------|------------|------|------|------|----------------|-------|------------|------------|----|----|----|----|
| 783.4658 | 783.4643   | 1.5  | 1.9  | 8.5  | C40 H67 N2 O13 | 531.7 | 0.177      | 83.76      | 40 | 67 | 2  | 13 |
| 783.4630 | 783.4630   | 2.8  | 3.6  | 14.5 | C37 H59 N12 O7 | 534.1 | 2.610      | 7.36       | 37 | 59 | 12 | 7  |
| 783.4657 | 783.4657   | 0.1  | 0.1  | 13.5 | C41 H63 N6 O9  | 534.3 | 2.757      | 6.35       | 41 | 63 | 6  | 9  |
| 783.4643 | 783.4643   | 1.5  | 1.9  | 19.5 | C38 H55 N16 O3 | 535.7 | 4.178      | 1.53       | 38 | 55 | 16 | 3  |
| 783.4670 | 783.4670   | -1.2 | -1.5 | 18.5 | C42 H59 N10 O5 | 536.4 | 4.951      | 0.71       | 42 | 59 | 10 | 5  |
| 783.4683 | 783.4683   | -2.5 | -3.2 | 12.5 | C45 H67 O11    | 538.8 | 7.353      | 0.06       | 45 | 67 |    | 11 |
| 783.4683 | 783.4683   | -2.5 | -3.2 | 23.5 | C43 H55 N14 O  | 538.9 | 7.361      | 0.06       | 43 | 55 | 14 | 1  |
| 783.4675 | 783.4675   | -1.7 | -2.2 | 0.5  | C20 H47 N8 O16 | 530.1 | 7.606      | 0.05       | 20 | 47 | 8  | 16 |

1: TOF MS ES+

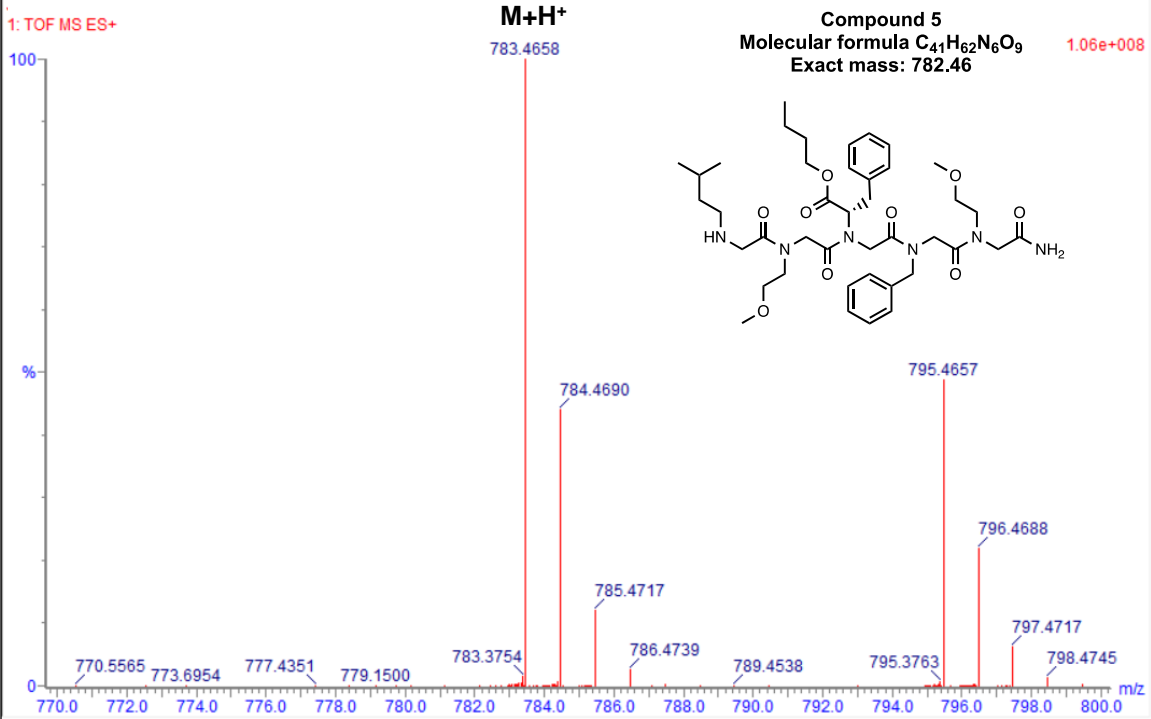

## 2. Analytical RP-HPLC Spectra and HPLC/MS Spectra

Analytical RP-HPLC and ESI-MS data for peptoids **1-16**. ESI-MS spectra were obtained using a Waters AutoPurification HPLC/MS system with a semi-preparative C<sub>18</sub> column. Analytical HPLC spectra were obtained from a linear gradient of 5-95% ACN/H<sub>2</sub>O (0.1% TFA) over 10 min using a C<sub>18</sub> column (Waters XBridge BEH300 4.6x50 mm) with a flow rate of 0.7 mL/min at UV detection 220 nm. For compound 5, an Agilent HPLC 1260 Infinity with an Eclipse Plus C<sub>18</sub> column (3.5  $\mu$ M, 4.6 x 100 mm) was used in place of the Waters instrument.

The overall purified percent yield values were calculated by dividing the mass of isolated pure product by the theoretical mass determined from the reaction scale using 100 mg of resin with 0.2 mmol/g loading. The average yields per number of steps was determined using the overall purified yield and the number of reaction steps required for each oligomer synthesis, including the initial resin deprotection step and the final resin cleavage step.

**1:**

Amine submonomer 1: 2-Methoxyethylamine

Amine submonomer 2: Benzylamine

Amine submonomer 3: L-Phenylalanine

Theoretical yield: 9.69 mg

Crude Mass: 9.3 mg

Crude Yield: 96%

Pure Mass: 7.3 mg

Overall Purified Yield: 75%

Average Yield over 8 Steps: 97%

Calculated  $m/z$ ,  $[M + H^+]$ : 485.24

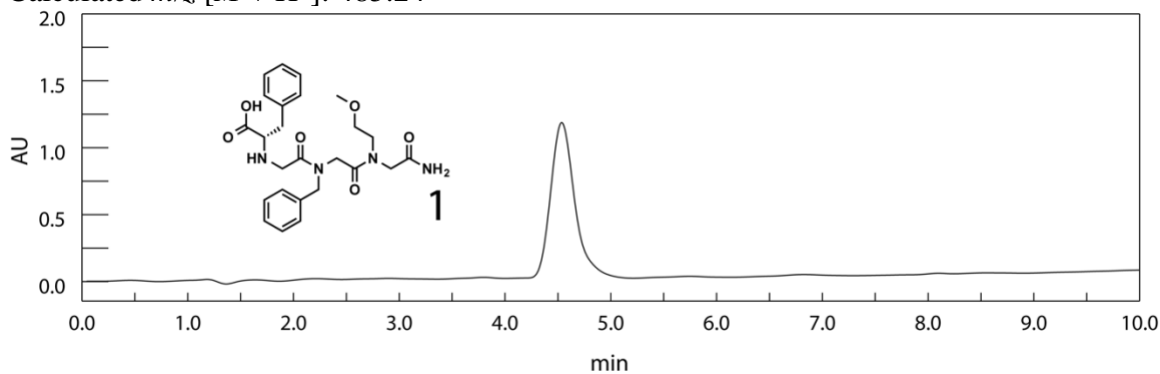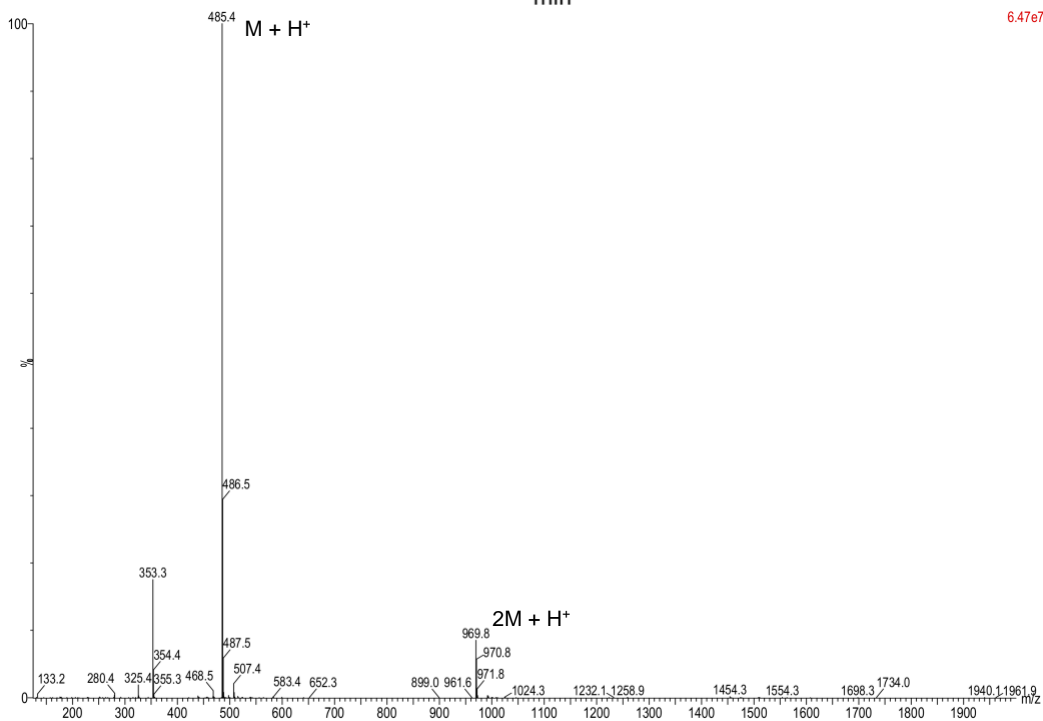

**2:**

Amine submonomer 1: 2-Methoxyethylamine

Amine submonomer 2: Benzylamine

Amine submonomer 3: L-Phenylalanine

Amino acid side chain coupling partner: Morpholine

Theoretical Yield: 11.07 mg

Crude Mass: 11.0 mg

Crude Yield: 99%

Pure Mass: 7.6 mg

Overall Purified Yield: 69%

Average Yield Over 9 Steps: 96%

Calculated  $m/z$  [ $M + H^+$ ]: 554.30

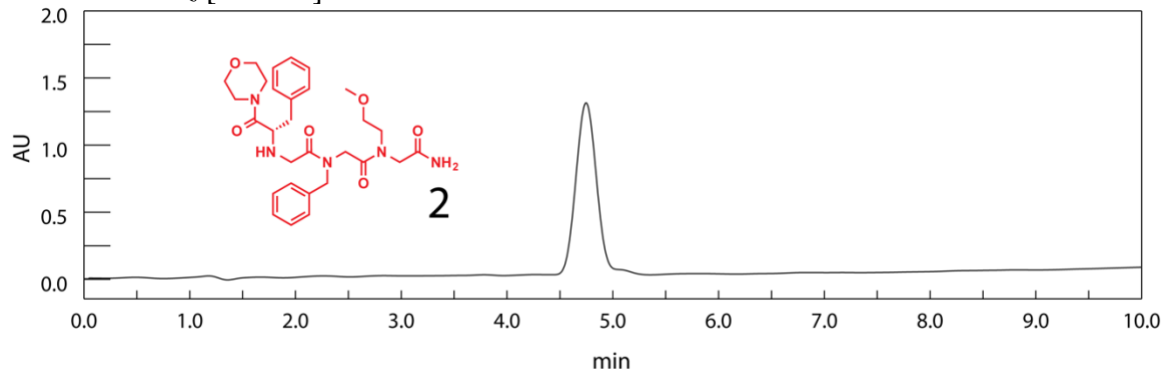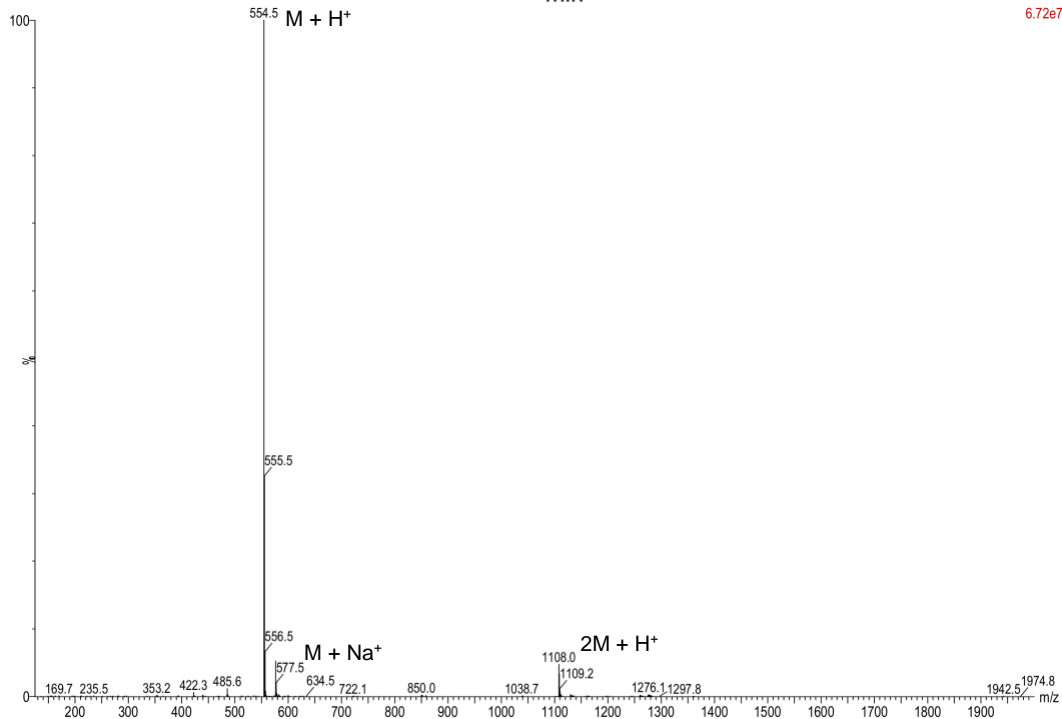



**3:**

Amine submonomer 1: 2-Methoxyethylamine

Amine submonomer 2: Benzylamine

Amine submonomer 3: L-Phenylalanine

Amino acid side chain coupling partner: Morpholine

Amine submonomer 4: 2-Methoxyethylamine

Amine submonomer 5: Isopentylamine

Theoretical Yield: 15.92 mg

Crude Mass: 14.1 mg

Crude Yield: 89%

Pure Mass: 7.0 mg

Overall Purified Yield: 44%

Average Yield Over 13 Steps: 94%

Calculated  $m/z$  [ $M + H^+$ ]: 796.46

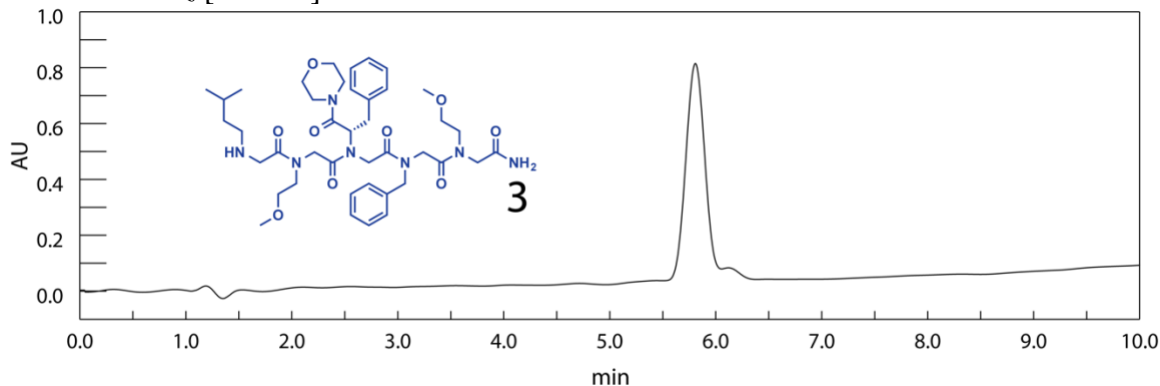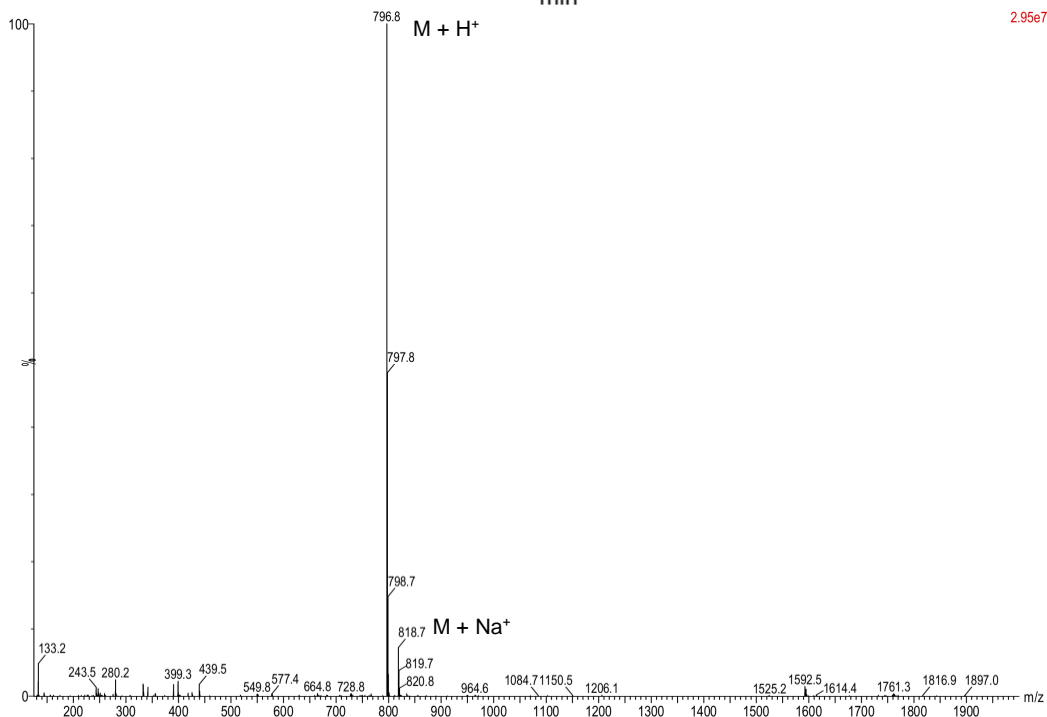

**4:**

Amine submonomer 1: 2-Methoxyethylamine

Amine submonomer 2: Benzylamine

Amine submonomer 3: L-Phenylalanine

Amino acid side chain coupling partner: 1-Butanol

Theoretical Yield: 10.81 mg

Crude Mass: 10.3 mg

Crude Yield: 95%

Pure Mass: 5.1 mg

Overall Purified Yield: 47%

Average Yield Over 9 Steps: 92%

Calculated  $m/z$  [ $M + H^+$ ]: 541.30

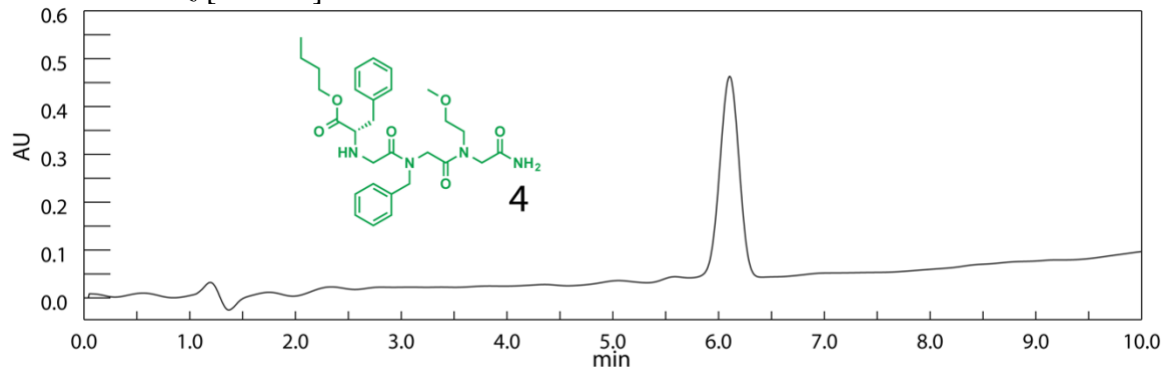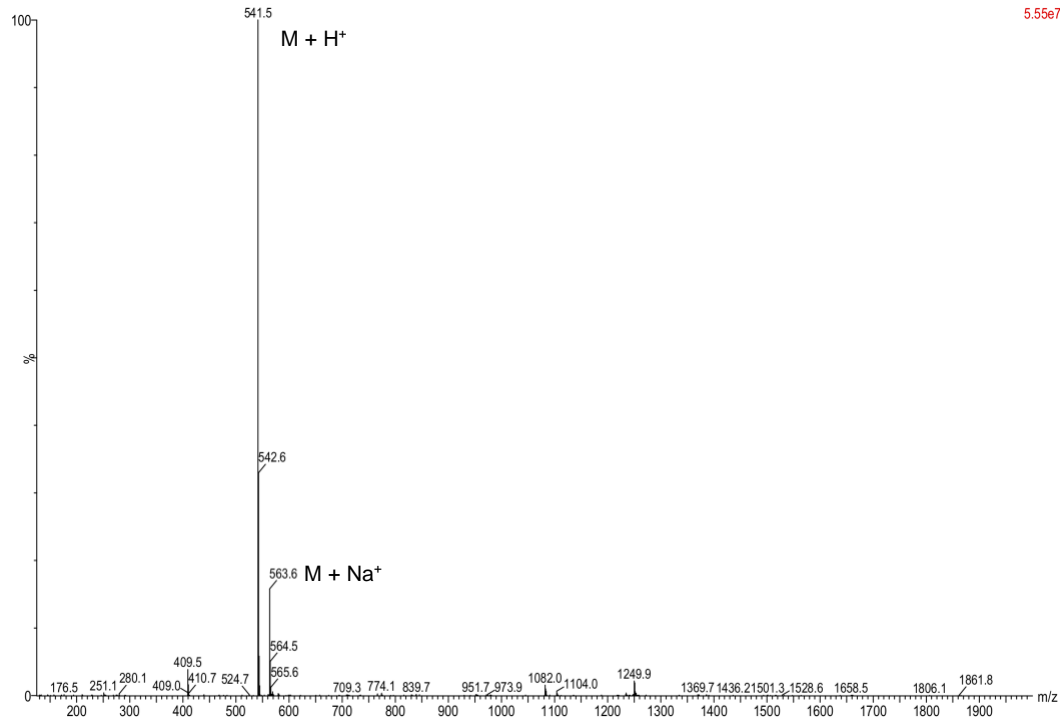

5:

Amine submonomer 1: 2-Methoxyethylamine

Amine submonomer 2: Benzylamine

Amine submonomer 3: L-Phenylalanine

Amino acid side chain coupling partner: 1-Butanol

Amine submonomer 4: 2-Methoxyethylamine

Amine submonomer 5: Isopentylamine

Theoretical Yield: 15.65 mg

Crude Mass: 15.5 mg

Crude Yield: 99%

Pure Mass: 6.9 mg

Overall Purified Yield: 44%

Average Yield Over 13 Steps: 94%

Calculated  $m/z$  [ $M + H^+$ ]: 783.47

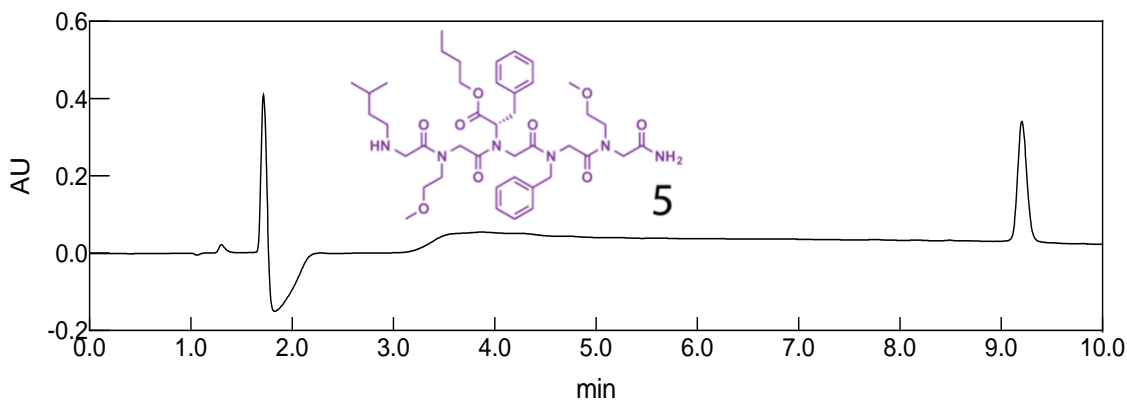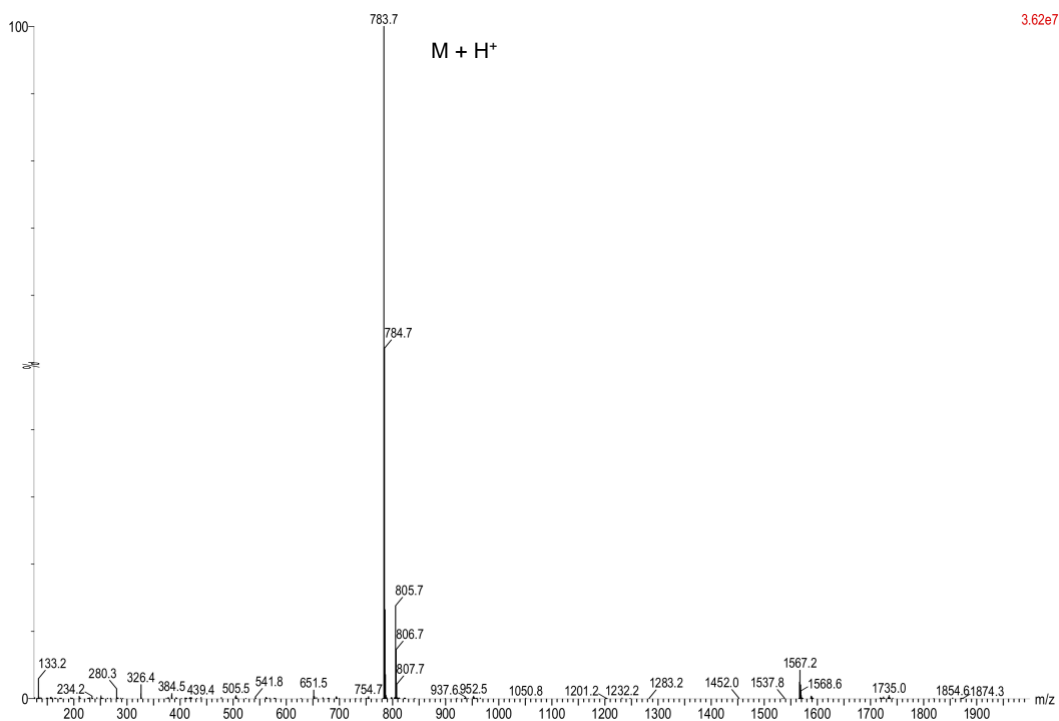

6:

Amine submonomer 1: 2-Methoxyethylamine

Amine submonomer 2: Benzylamine

Amine submonomer 3: L-Phenylalanine

Amino acid side chain coupling partner: Cyclohexanethiol

Theoretical Yield: 11.65 mg

Crude Mass: 11.2 mg

Crude Yield: 96%

Pure Mass: 5.5 mg

Overall Purified Yield: 47%

Average Yield Over 9 Steps: 92%

Calculated  $m/z$  [ $M + H^+$ ]: 583.30

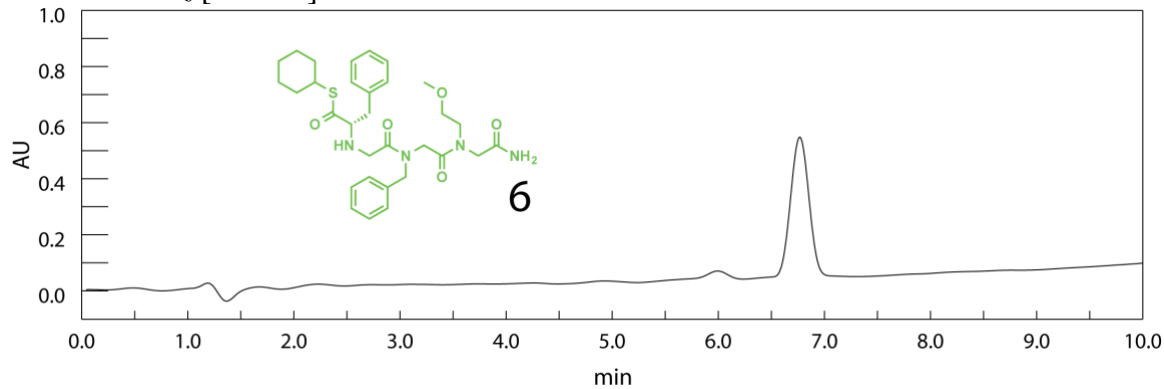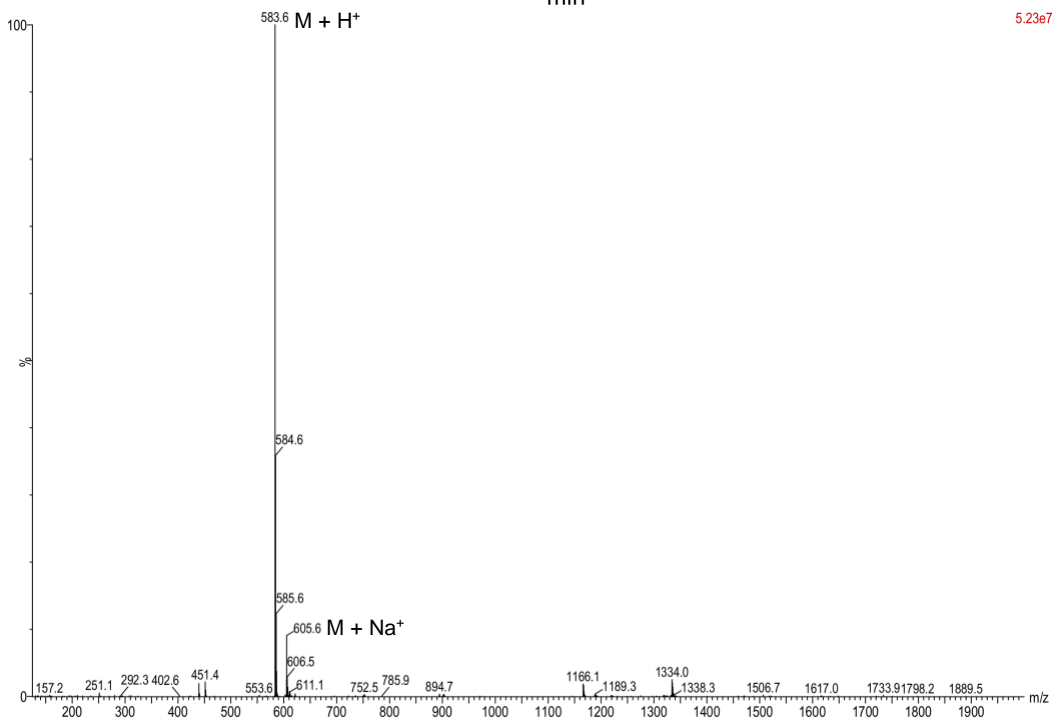

7:

Amine submonomer 1: L-Alanine

Amino acid side chain coupling partner: 2-Methoxyethylamine

Amine submonomer 2: (S)-1-Phenylethylamine

Amine submonomer 3: L-Phenylalanine

Amino acid side chain coupling partner: Benzylamine

Amine submonomer 4: L-Leucine

Amino acid side chain coupling partner: Isopropylamine

Amine submonomer 5: (S)-1-Phenylethylamine

Amine submonomer 6: L-Alanine

Amino acid side chain coupling partner: Aniline

Theoretical Yield: 24.7 mg

Crude Mass: 6.2 mg

Crude Yield: 25%

Pure Mass: 1.2 mg

Overall Purified Yield: 5%

Average Yield Over 18 Steps: 85%

Calculated  $m/z$  [ $M + H^+$ ]: 1236.68

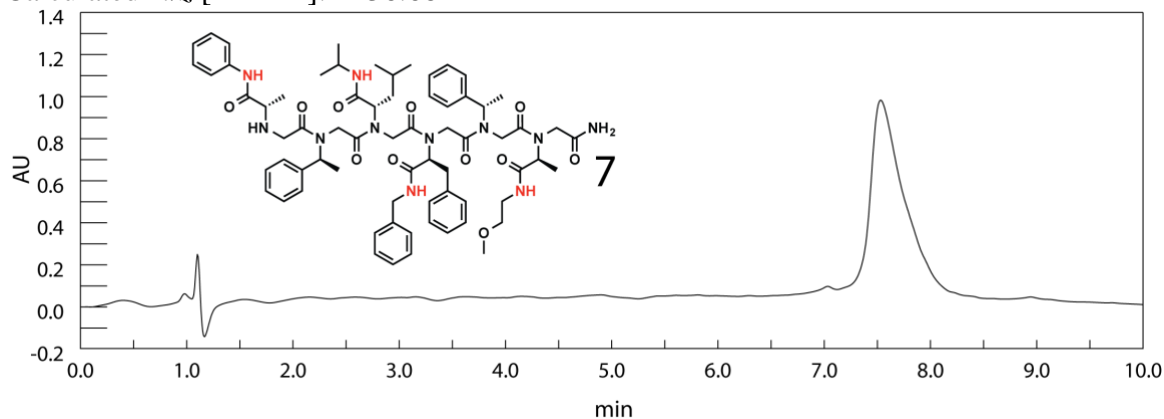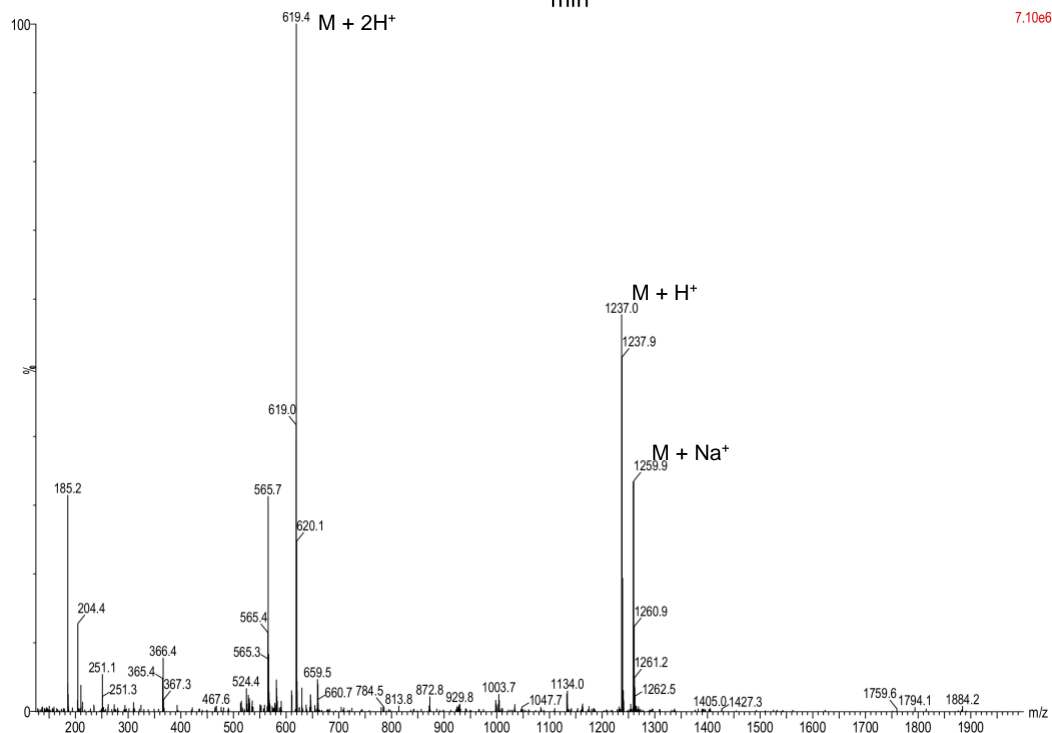

**8:**

Amine submonomer 1: L-Phenylalanine

Amino acid side chain coupling partner: Propargylamine

Amine submonomer 2: Aniline

Amine submonomer 3: L-Glutamine

Amino acid side chain coupling partner:  $\beta$ -Alanine *tert*-butyl ester

Amine submonomer 4: L-Serine

Amino acid side chain coupling partner: (*S*)-1-Phenylethylamine

Amine submonomer 5: *N*-Boc-ethylenediamine

Amine submonomer 6: L-Proline

Amino acid side chain coupling partner: *N*-Boc-ethylenediamine

Theoretical Yield: 23.9 mg

Crude Mass: 15.0 mg

Crude Yield: 63%

Pure Mass: 2.3 mg

Overall Purified Yield: 10%

Average Yield Over 18 Steps: 88%

Calculated  $m/z$  [ $M + H^+$ ]: 1195.59

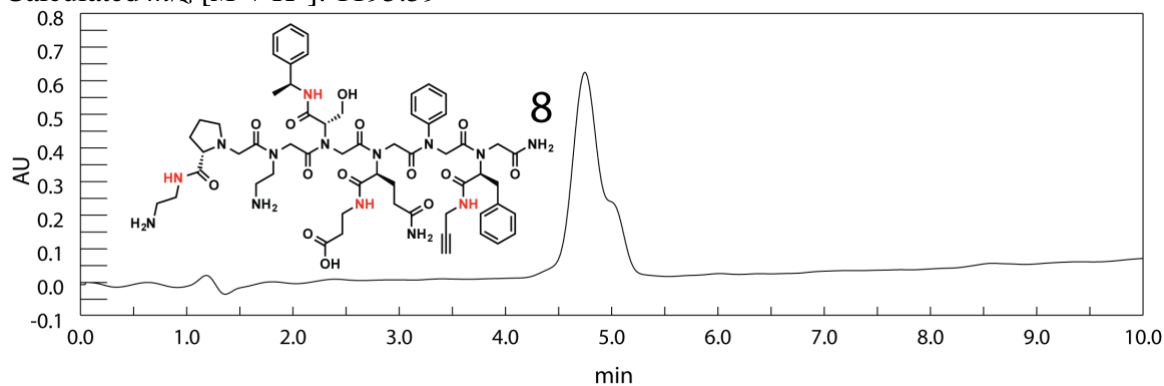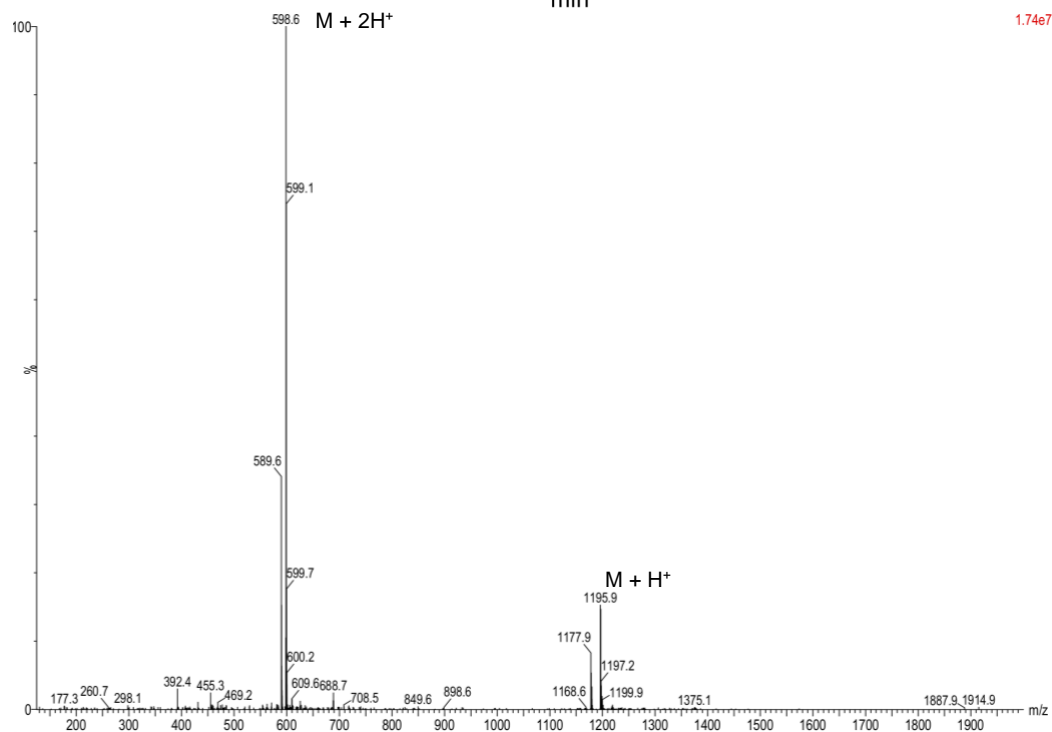

**9:**

Amine submonomer 1: Glycine

Amino acid side chain coupling partner: Isopentylamine

Amine submonomer 2: (*S*)-1-Phenylethylamine

Amine submonomer 3: L-Isoleucine

Amino acid side chain coupling partner: *N*-Boc-ethylenediamine

Amine submonomer 4: L-Phenylalanine

Amino acid side chain coupling partner: Cyclopropylmethanamine

Amine submonomer 5: 2-Methoxyethylamine

Amine submonomer 6: D-Phenylalanine

Amino acid side chain coupling partner: 4-Iodoaniline

Theoretical Yield: 27.1 mg

Crude Mass: 5.7 mg

Crude Yield: 21%

Pure Mass: 1.9 mg

Overall Purified Yield: 7%

Average Yield Over 18 Steps: 86%

Calculated  $m/z$  [ $M + H^+$ ]: 1355.61

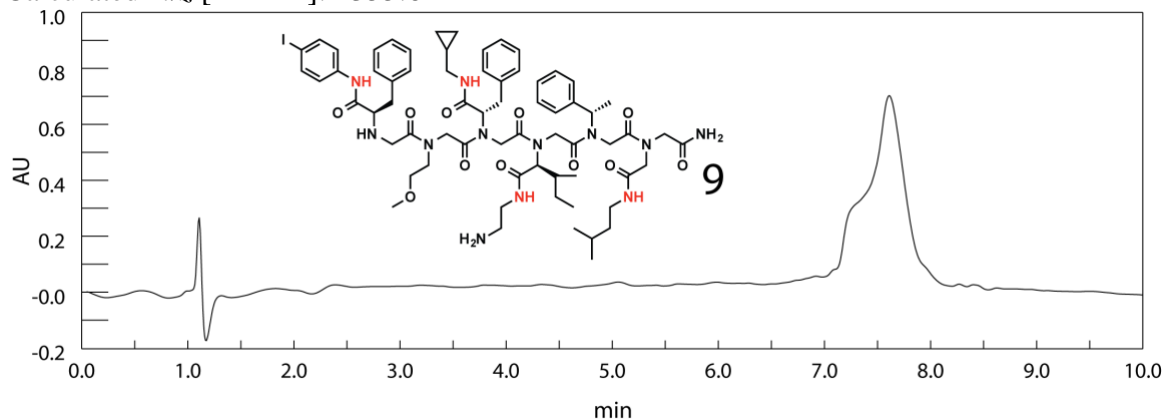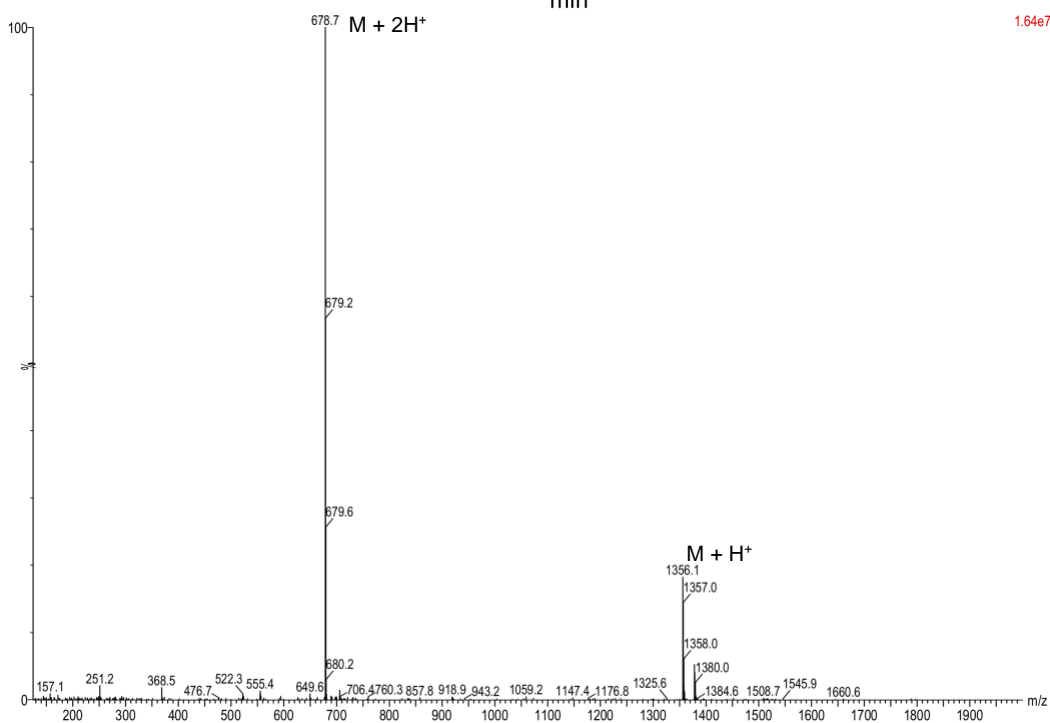

**10:**

Amine submonomer 1: L-Alanine

Amino acid side chain coupling partner: Isopropylamine

Amine submonomer 2: 2-Methoxyethylamine

Amine submonomer 3: L-Phenylalanine

Amino acid side chain coupling partner: 4-(Trifluoromethoxy)benzylamine

Amine submonomer 4: L-Valine

Amino acid side chain coupling partner: Furfurylamine

Amine submonomer 5: 2-Methoxyethylamine

Amine submonomer 6: L-Methionine

Amino acid side chain coupling partner: 3-Bromobenzylamine

Theoretical Yield: 27.7 mg

Crude Mass: 2.8 mg

Crude Yield: 10%

Pure Mass: 0.4 mg

Overall Purified Yield: 2%

Average Yield Over 18 Steps: 80%

Calculated  $m/z$  [ $M + H^+$ ]: 1388.52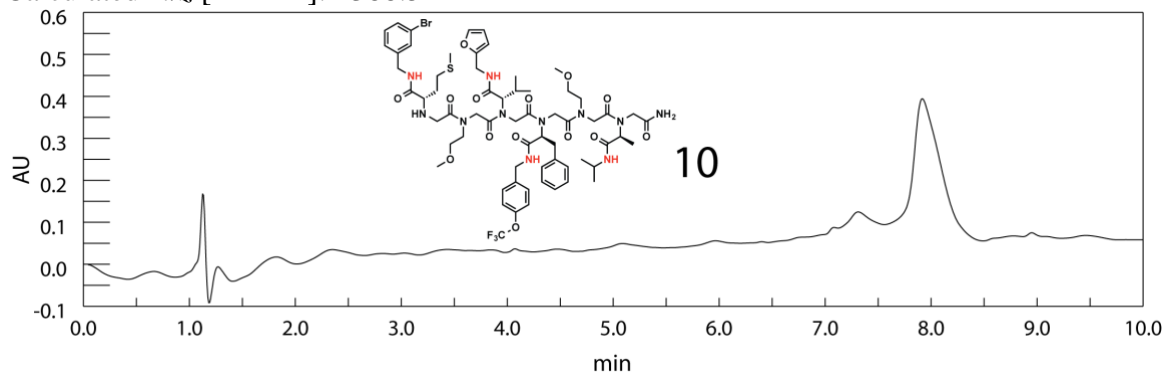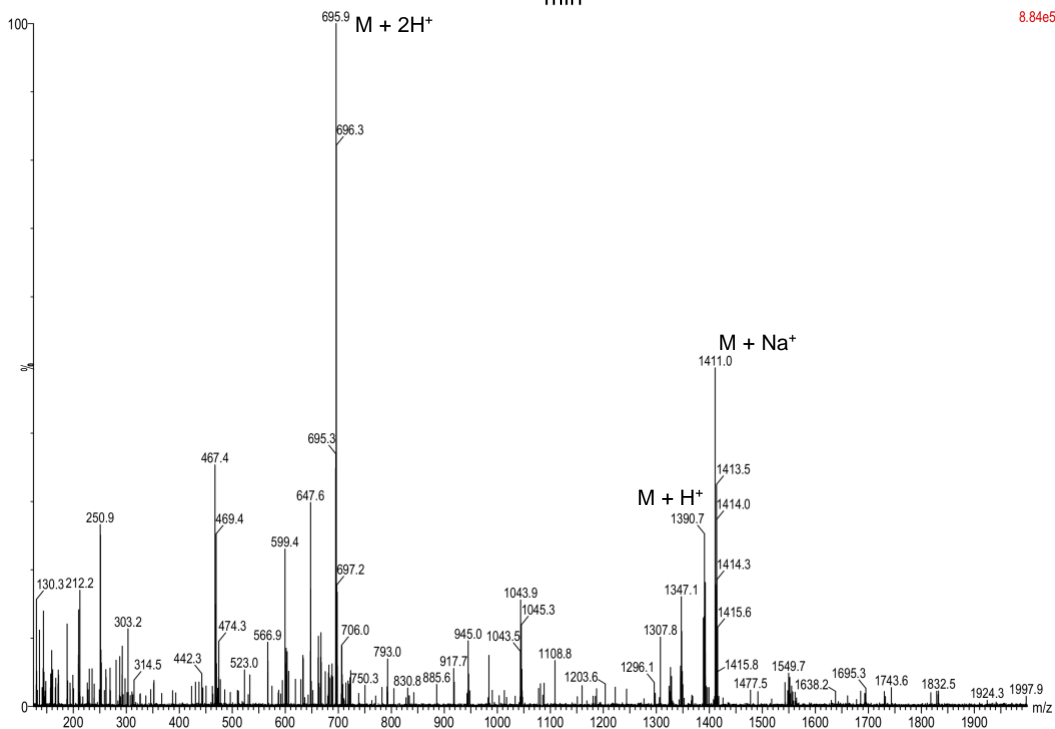



**11:**

Amine submonomer 1: L-Leucine

Amino acid side chain coupling partner: 2,2-Diphenylethylamine

Amine submonomer 2: Benzylamine

Amine submonomer 3:  $\beta$ -AlanineAmino acid side chain coupling partner: *N*-Boc-ethylenediamineAmine submonomer 4:  $\beta$ -Alanine

Amino acid side chain coupling partner: 4-Methylbenzylamine

Amine submonomer 5: Benzylamine

Amine submonomer 6: L-Alanine

Amino acid side chain coupling partner: *O*-*tert*-Butyl-dimethylsilyl-ethanolamine

Theoretical Yield: 24.7 mg

Crude Mass: 5.1 mg

Crude Yield: 21%

Pure Mass: 2.4 mg

Overall Purified Yield: 10%

Average Yield Over 18 Steps: 88%

Calculated  $m/z$  [ $M + H^+$ ]: 1237.68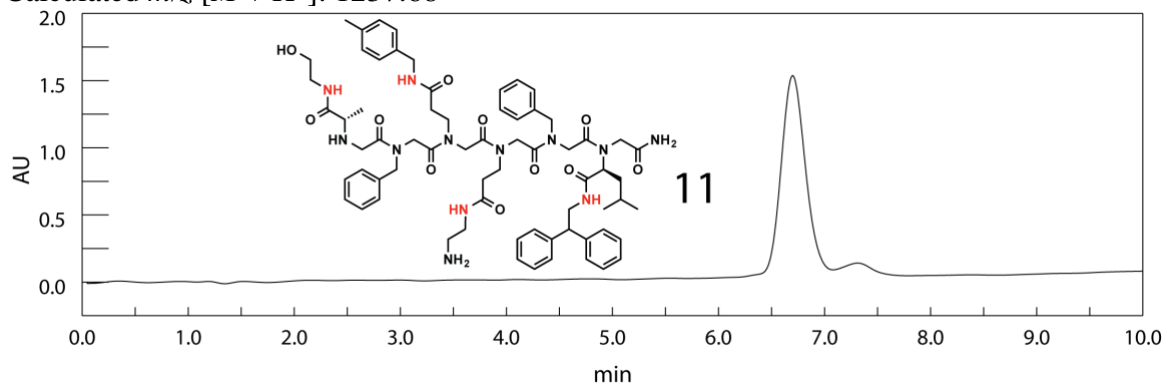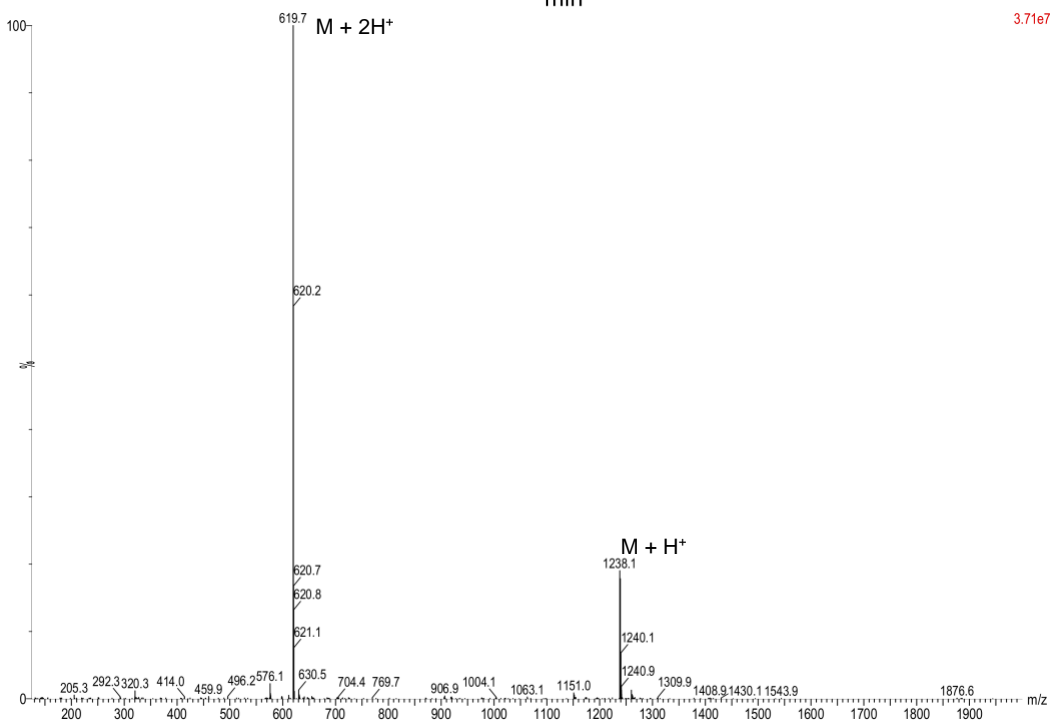

**12:**

Amine submonomer 1: L-Alanine

Amino acid side chain coupling partner: *N*-Boc-ethylenediamine

Amine submonomer 2: Isopentylamine

Amine submonomer 3: L-Leucine

Amino acid side chain coupling partner: Benzyl alcohol

Amine submonomer 4: L-Alanine

Amino acid side chain coupling partner: Benzylamine

Amine submonomer 5: Isopentylamine

Amine submonomer 6: L-Phenylalanine

Amino acid side chain coupling partner: Trifluoroethanol

Theoretical Yield: 24.1 mg

Crude Mass: 5.8 mg

Crude Yield: 24%

Pure Mass: 0.6 mg

Overall Purified Yield: 3%

Average Yield Over 18 Steps: 82%

Calculated  $m/z$  [ $M + H^+$ ]: 1209.66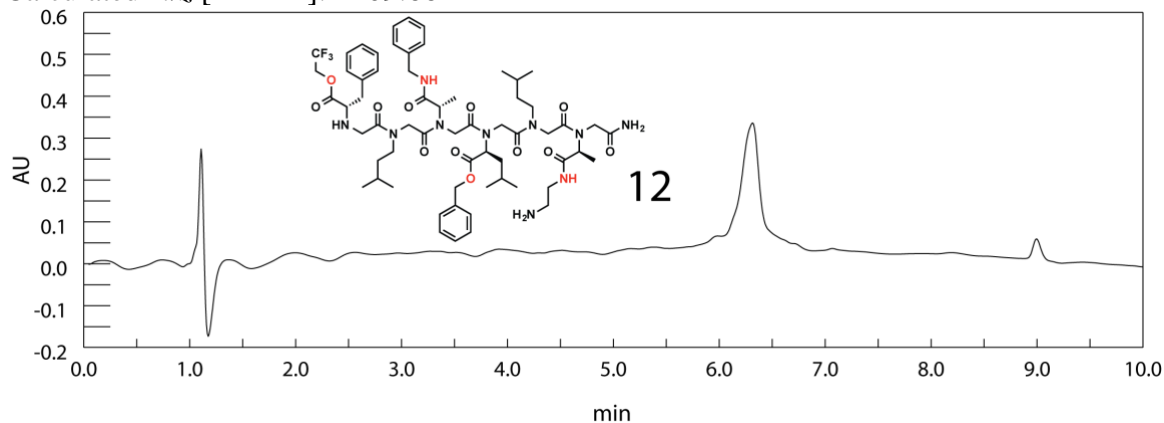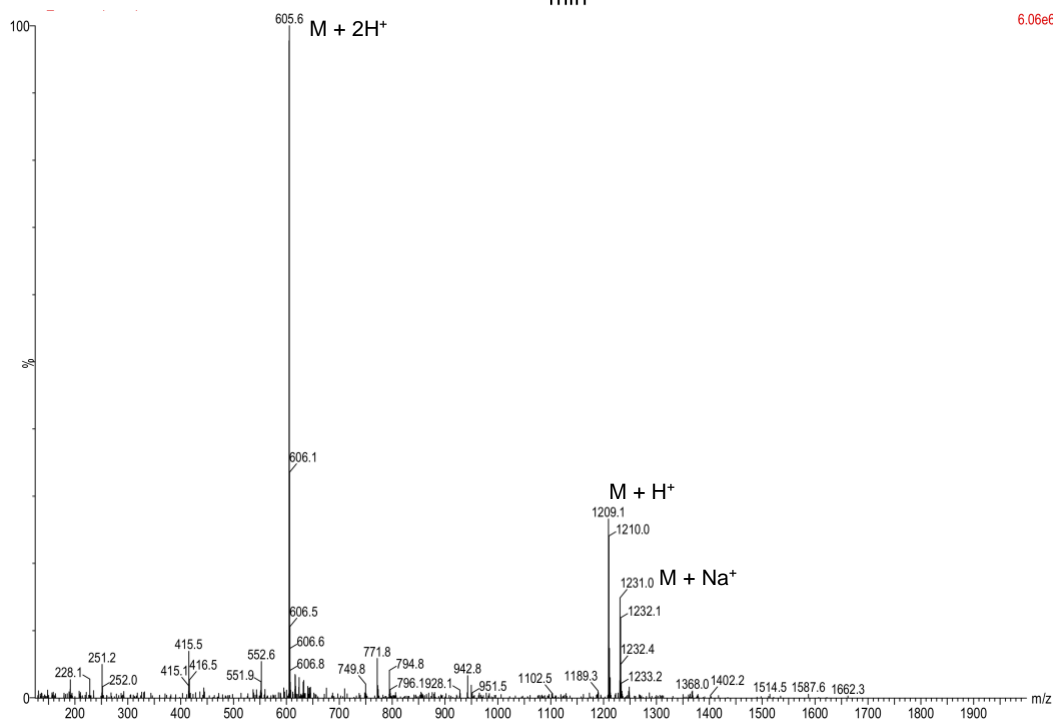

**13:**

Amine submonomer 1: L-Phenylalanine

Amino acid side chain coupling partner: (*S*)-1-Phenylethylamine

Amine submonomer 2: 2-Methoxyethylamine

Amine submonomer 3: L-Phenylalanine

Amino acid side chain coupling partner: 2-Methoxyethylamine

Amine submonomer 4: L-Phenylalanine

Amino acid side chain coupling partner: *N*-Boc-ethylenediamine

Amine submonomer 5: 2-Methoxyethylamine

Amine submonomer 6: L-Phenylalanine

Amino acid side chain coupling partner: Furfurylthiol

Theoretical Yield: 27.3 mg

Crude Mass: 4.4 mg

Crude Yield: 16%

Pure Mass: 0.6 mg

Overall Purified Yield: 2%

Average Yield Over 18 Steps: 80%

Calculated  $m/z$  [ $M + H^+$ ]: 1366.66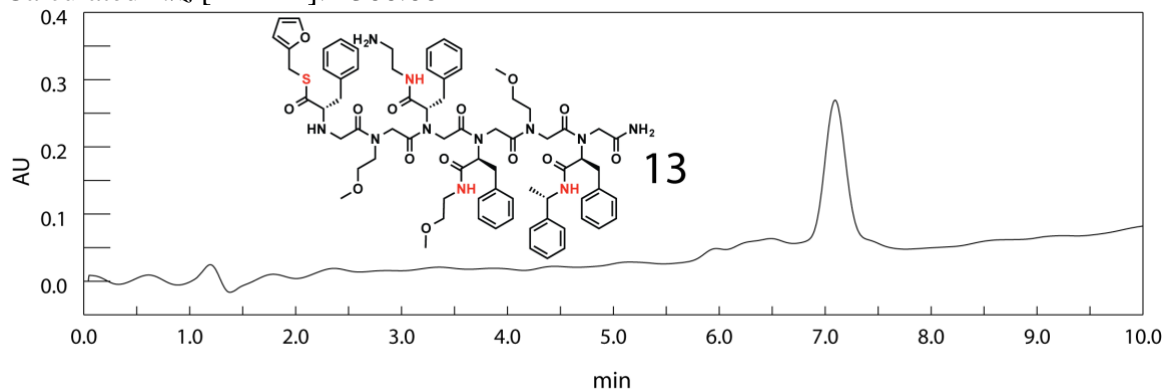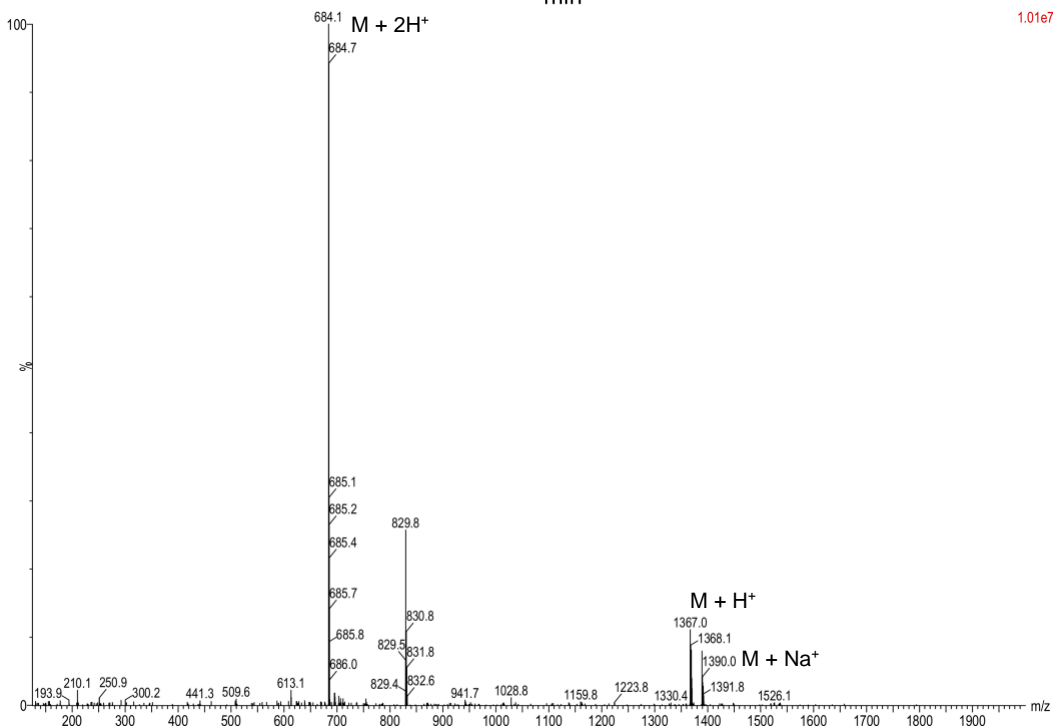

**14:**

Amine submonomer 1: L-Alanine

Amino acid side chain coupling partner: (*S*)-1-Methoxy-2-propylamine

Amine submonomer 2: Benzylamine

Amine submonomer 3: L-Leucine

Amino acid side chain coupling partner: (*S*)-1-Cyclohexylethylamine

Amine submonomer 4: L-Alanine

Amino acid side chain coupling partner: Isopropylamine

Amine submonomer 5: Benzylamine

Amine submonomer 6: L-Phenylalanine

Amino acid side chain coupling partner: Cyclohexanethiol

Theoretical Yield: 25.3 mg

Crude Mass: 5.7 mg

Crude Yield: 23%

Pure Mass: 1.2 mg

Overall Purified Yield: 5%

Average Yield Over 18 Steps: 85%

Calculated  $m/z$  [ $M + H^+$ ]: 1265.74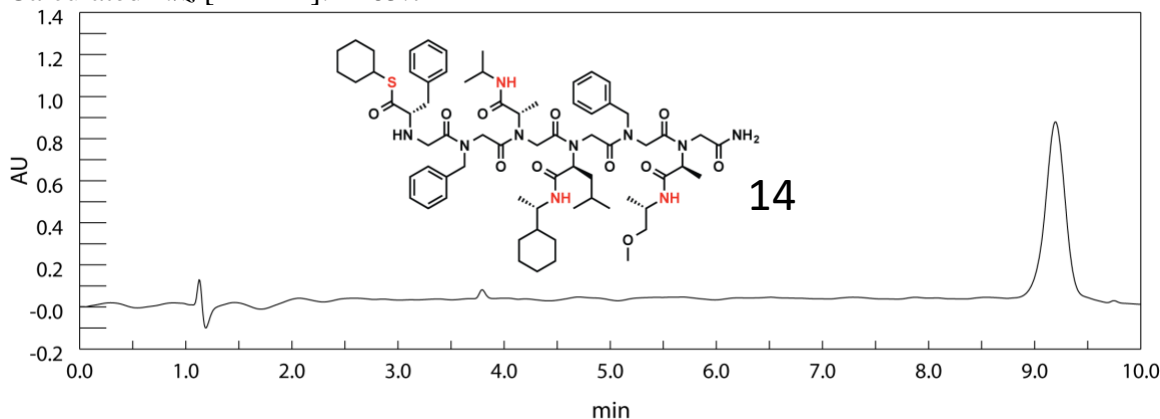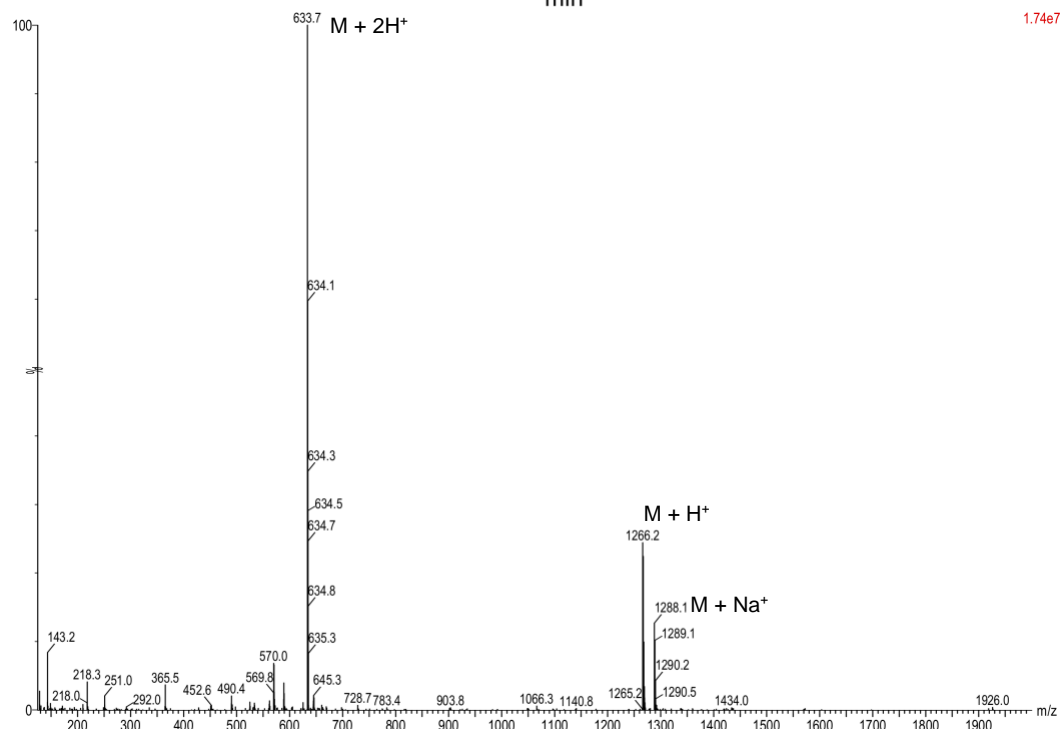

**15:**

Amine submonomer 1: L-Alanine

Amino acid side chain coupling partner: 4-Methoxyphenethylamine

Amine submonomer 2: 1-Propylamine

Amine submonomer 3: L-Alanine

Amino acid side chain coupling partner: Piperidine

Amine submonomer 4: L-Alanine

Amino acid side chain coupling partner: 1-Butanol

Amine submonomer 5: 1-Propylamine

Amine submonomer 6: L-Alanine

Amino acid side chain coupling partner: 1-Butanethiol

Theoretical Yield: 21.2 mg

Crude Mass: 4.2 mg

Crude Yield: 20%

Pure Mass: 1.0 mg

Overall Purified Yield: 5%

Average Yield Over 18 Steps: 85%

Calculated  $m/z$  [ $M + H^+$ ]: 1060.61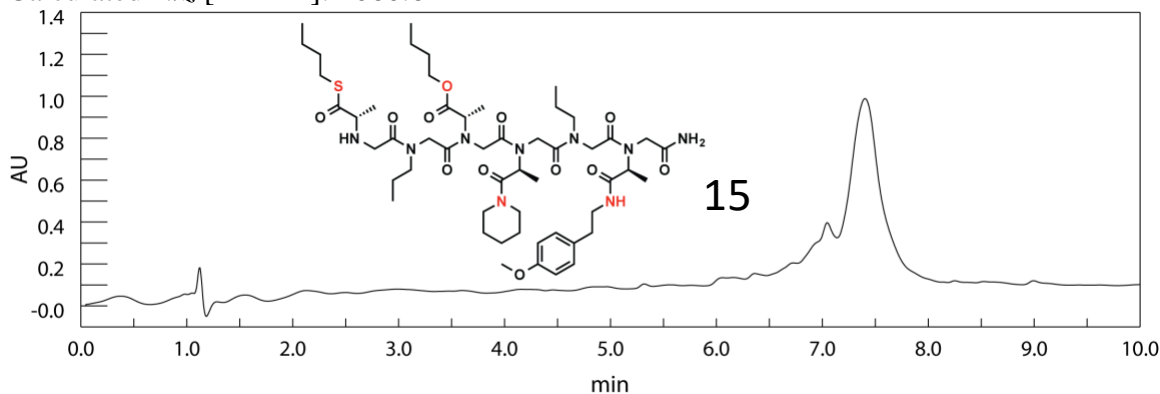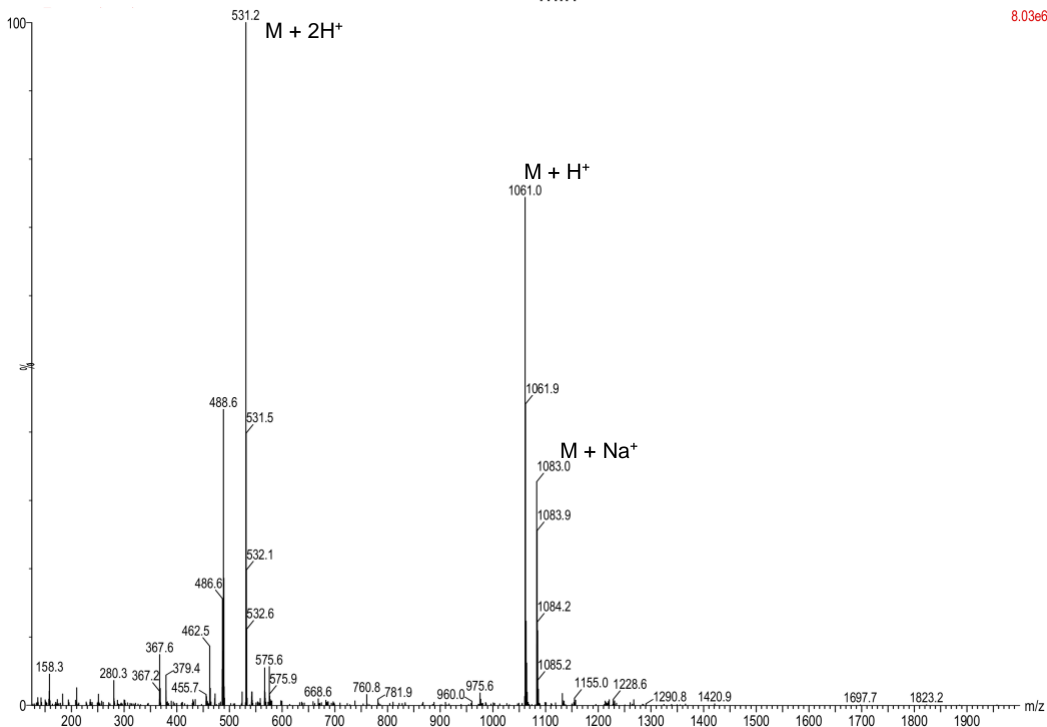

**16:**

Amine submonomer 1: L-Isoleucine

Amino acid side chain coupling partner: Morpholine

Amine submonomer 2: Benzylamine

Amine submonomer 3: L-Phenylalanine

Amino acid side chain coupling partner: 1-Butanol

Amine submonomer 4: L-Methionine

Amino acid side chain coupling partner: Piperidine

Amine submonomer 5: 2-Methoxyethylamine

Amine submonomer 6: Sarcosine

Amino acid side chain coupling partner: 1-Butanethiol

Theoretical Yield: 24.7 mg

Crude Mass: 4.4 mg

Crude Yield: 18%

Pure Mass: 1.4 mg

Overall Purified Yield: 6%

Average Yield Over 18 Steps: 86%

Calculated  $m/z$  [ $M + H^+$ ]: 1238.66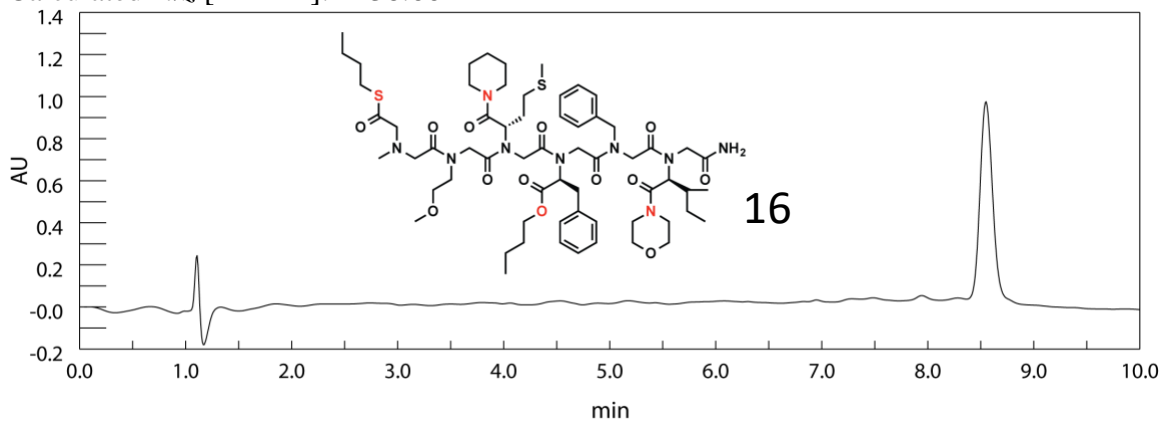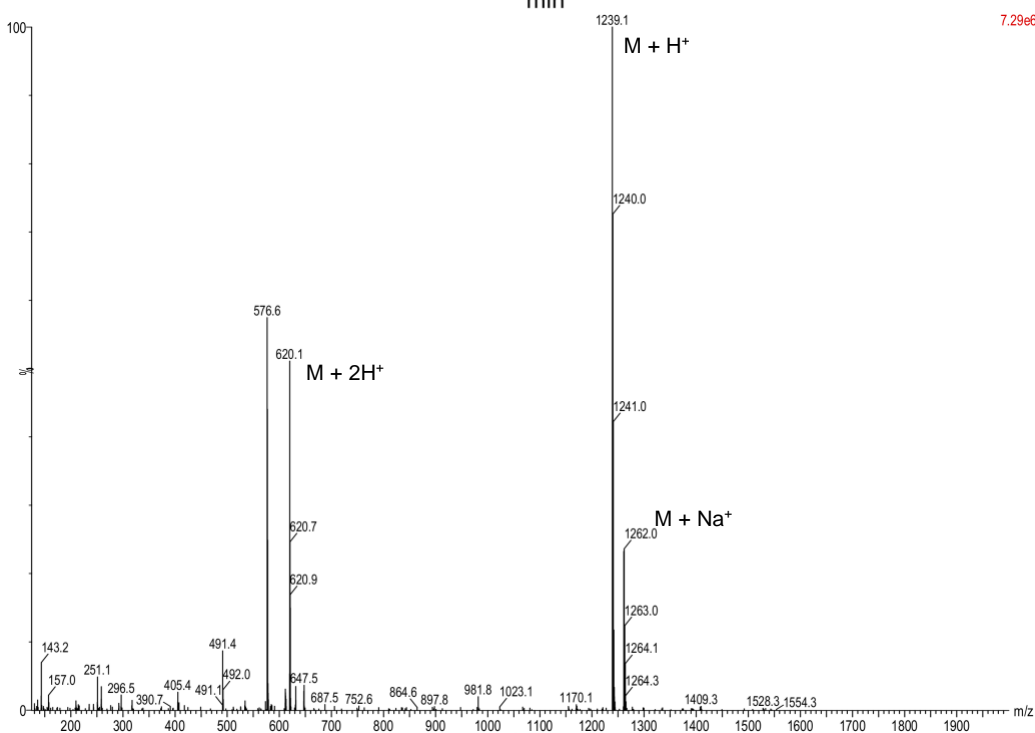

### 3. Example Peptoids using Unprotected Tyr, Cys, and His Submonomers

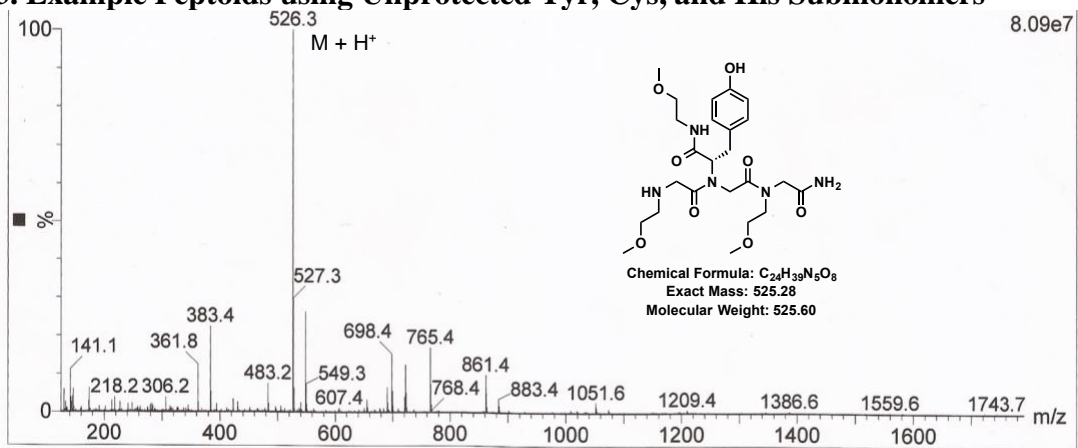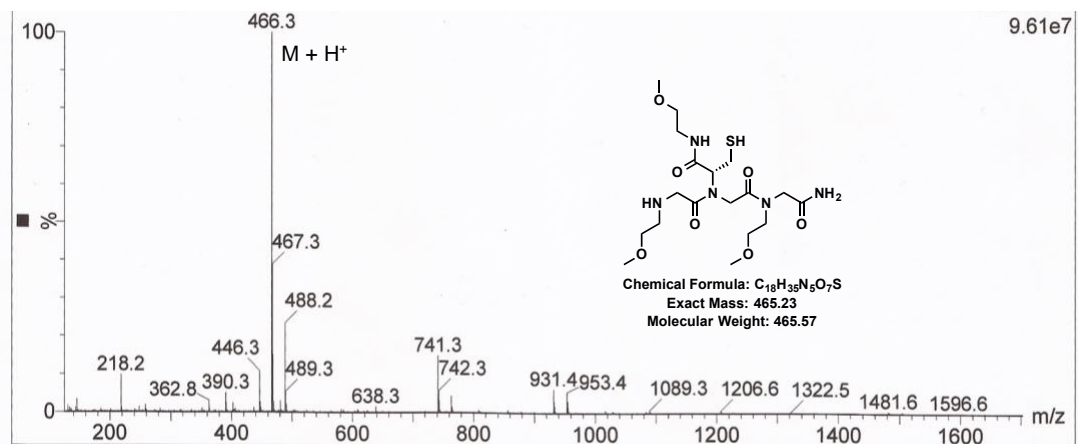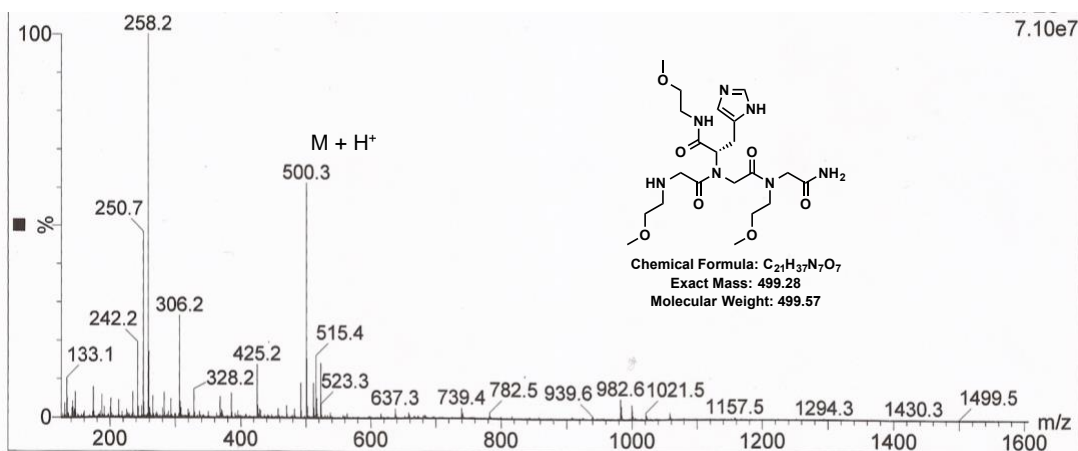

#### 4. Intermolecular, On-Resin DKP Formation

**Figure S1.** Proposed formation of diketopiperazines during the activation of a carboxylic acid peptoid side chain. An example of a putative DKP product formed between two L-phenylalanine carboxylic acid termini is shown. The side product was isolated by preparative HPLC and observed by LCMS. The extent of DKP formation appears to increase when the nucleophilicity of the desired synthon decreases. Notably this DKP formation results in termination of chain elongation.

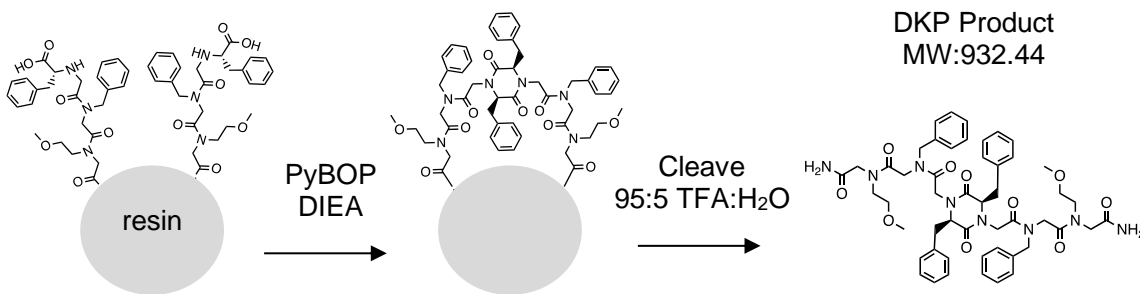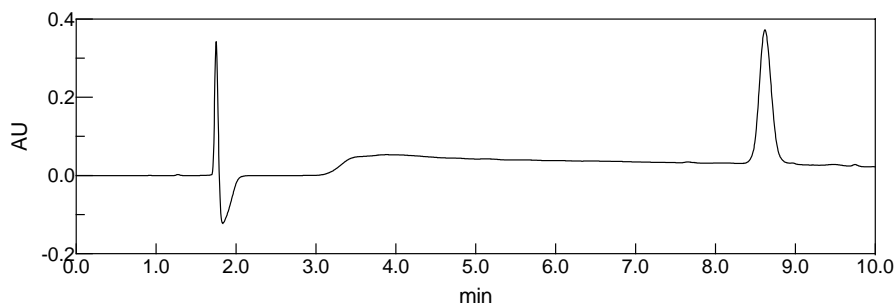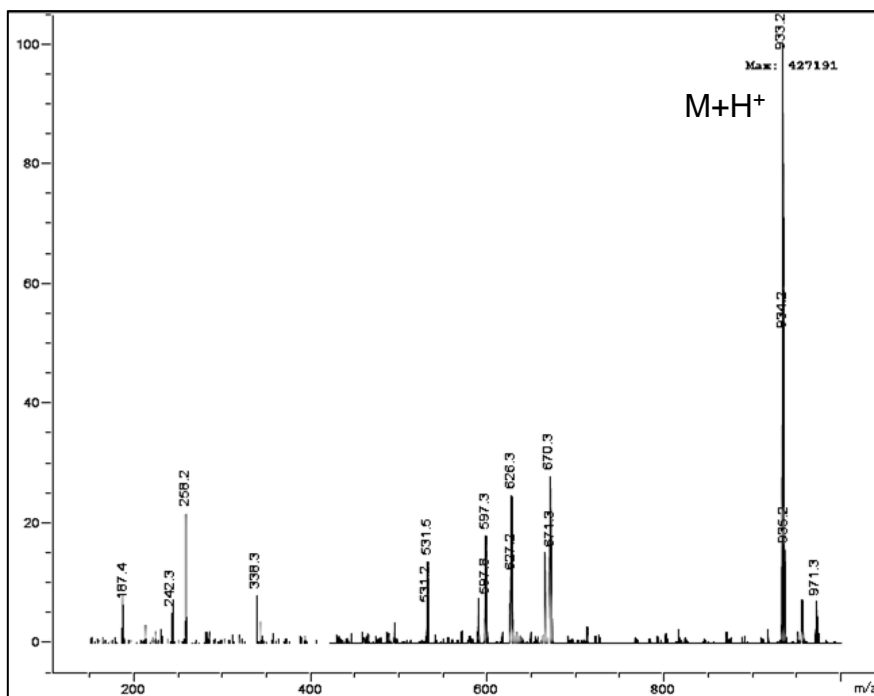



## 5. Circular Dichroism of Compounds 1, 4 and 5.

All CD experiments were conducted using a Jasco J-1500 circular dichroism spectrometer.

The sign for the ellipticity of compound 5 is opposite of that for compounds 1 and 4, which we attribute to a distinct conformational influence resulting from the presence of this monomer at non-terminal residues. Variations in circular dichroism may also arise due to partial racemization of the side chains under basic conditions. The influence of stereochemistry on conformation will be the subject of additional study.

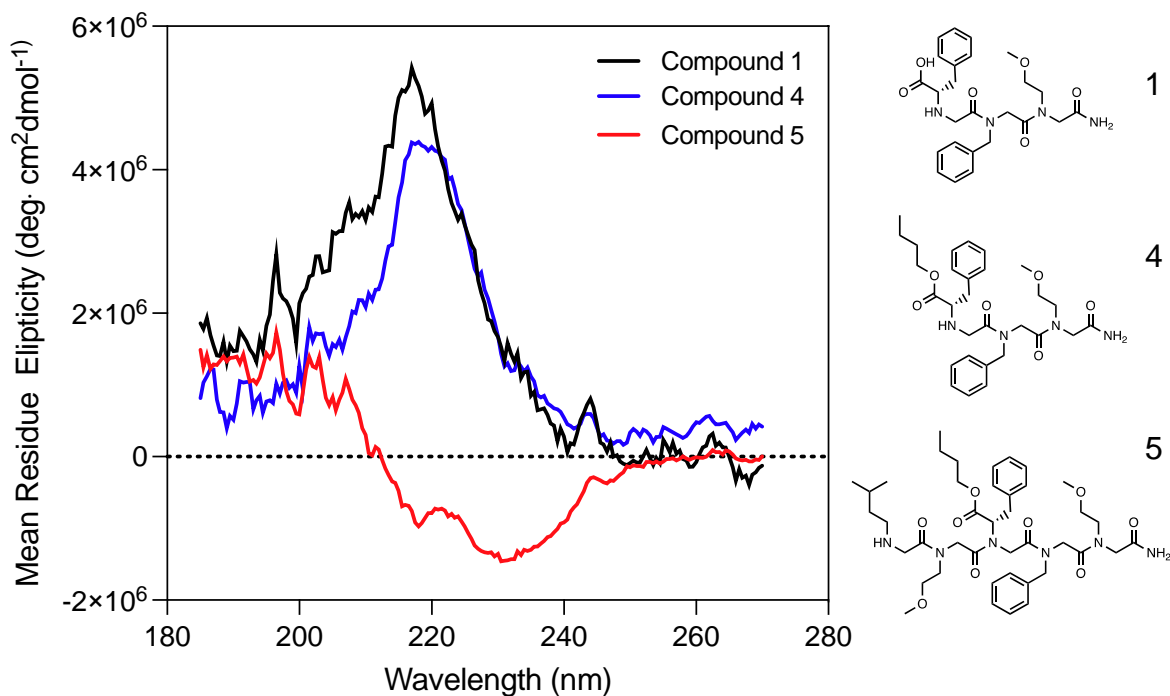

**Figure S2.** Circular Dichroism (CD) spectra of peptoids 1,4, and 5. Samples were prepared at 0.625 mM (~0.3-0.5 mg/mL) peptoid in acetonitrile and filtered (0.2 micron). 5 accumulations per sample were obtained at room temperature in a quartz cuvette (1mm pathlength). Solvent baseline was subtracted from the spectra and no smoothing functions were applied.
